# Supplementary material for: Next Generation Weight Loss Drugs for the Prevention of Cancer?
Source: PubMed Central journal article supplement (PMC10981222; doi:10.1177/10732748241241158), 2024-03-22
Supplement: sj-pdf-1-ccx-10.1177_10732748241241158.pdf [file sj-pdf-1-ccx-10.1177_10732748241241158.pdf]

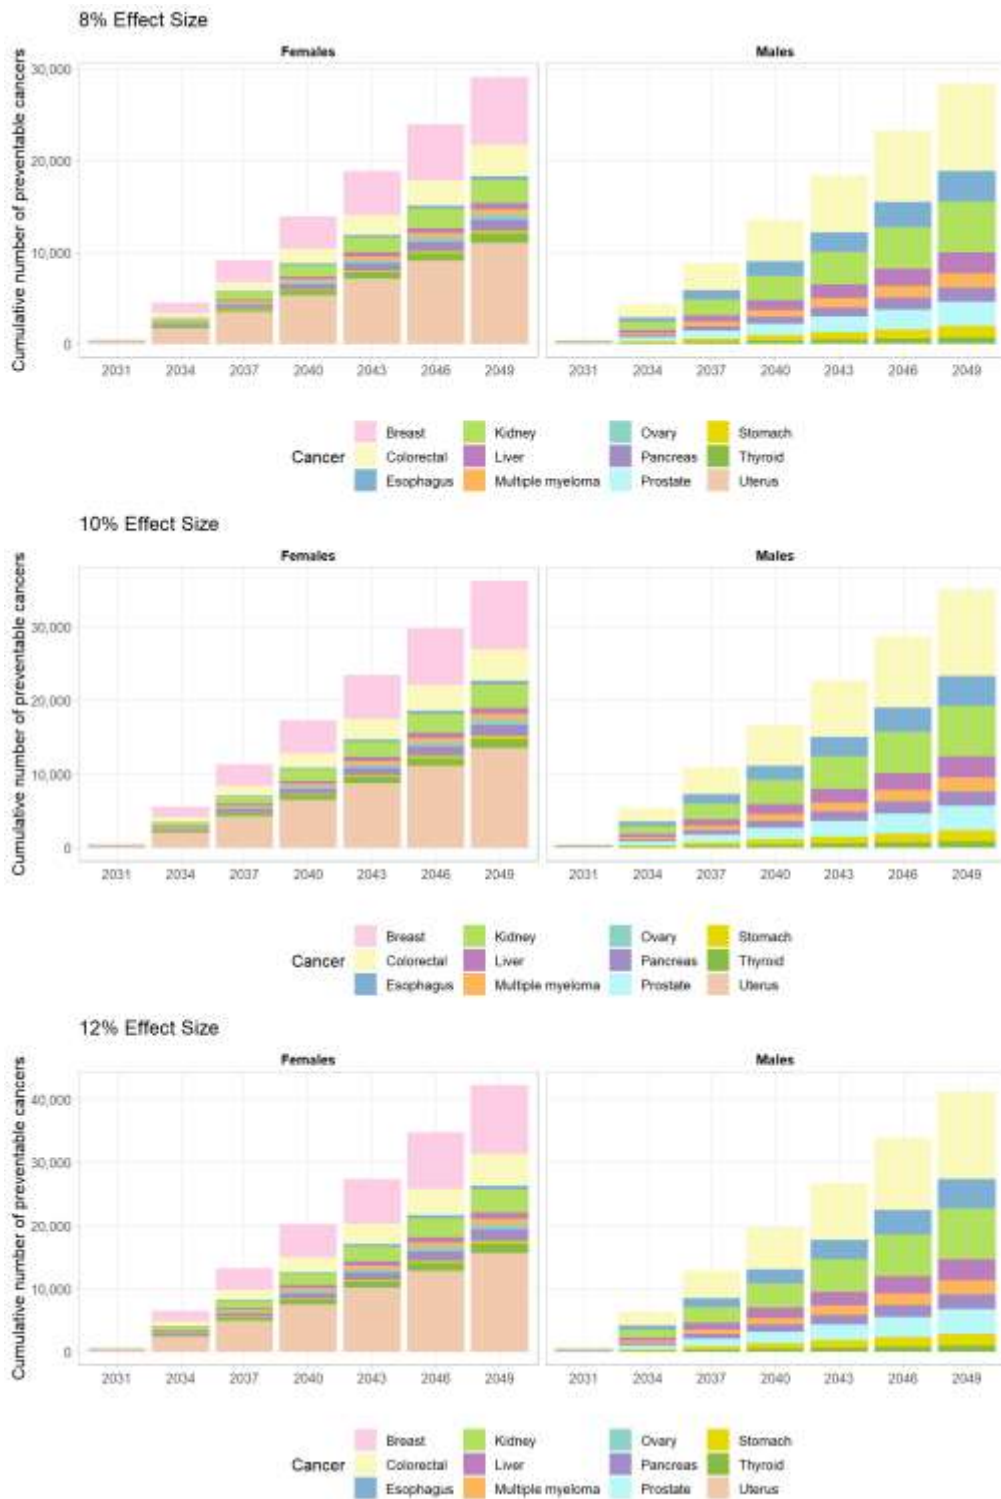

**Supplementary Figure 1.** Cumulative number of preventable site-specific obesity-related cancers in Canada between 2031 and 2049 for females and males attributable to reduction in body weight (8-12%) through GLP-1 receptor agonist use.
